# Supplementary material for: Application of TaqMan Real-Time PCR for Detecting ‘Candidatus Arsenophonus Phytopathogenicus’ Infection in Sugar Beet
Source: MDPI journal article supplement (doi:10.3390/pathogens10111466), 2021-11-12
Supplement: s1 [file s1]

Table S1: Ct values of TaqMan qPCR for the gene targets heat shock protein 20 (*hsp20*), mannose 6-phosphat isomerase (*manA*) and NADH-ubiquinone oxidoreductase chain 5 (*nad5*).

| mana       |                        |       |       |       | hsp20   |       |       |        |         | nad5  |
|------------|------------------------|-------|-------|-------|---------|-------|-------|--------|---------|-------|
| Sample No. | Sampling Site          | Run 1 | Run 2 | Run 3 | Mean ct | Run 1 | Run 2 | Run 3  | Mean ct | Run 1 |
| Sample 1   | Gundelsheim            | 30,1  | 29,0  | 29,4  | 29,5    | 28,8  | 28,5  | 25,9 * | 27,7    | 17,5  |
| Sample 2   | Gundelsheim            | 28,7  | 28,7  | 29,4  | 28,9    | 28,3  | 28,5  | 28,1   | 28,3    | 17,5  |
| Sample 3   | Gundelsheim            | 28,4  | 28,4  | 29,0  | 28,6    | 28,7  | 28,8  | 28,5   | 28,7    | 18,5  |
| Sample 4   | Gundelsheim            | 28,2  | 28,3  | 28,8  | 28,4    | 28,6  | 28,7  | 28,6   | 28,6    | 17,7  |
| Sample 5   | Gundelsheim            | 28,7  | 28,3  | 28,0  | 28,3    | 28,9  | 28,6  | 28,3   | 28,6    | 17,8  |
| Sample 6   | Gundelsheim            | 29,0  | 29,4  | 29,5  | 29,3    | 29,4  | 29,0  | 28,8   | 29,1    | 19,0  |
| Sample 7   | Gundelsheim            | 32,0  | 31,4  | 31,5  | 31,6    | 31,0  | 30,7  | 29,0   | 30,2    | 17,6  |
| Sample 8   | Massenbach             | 31,9  | 32,3  | 32,2  | 32,1    | 31,2  | 30,8  | 30,8   | 30,9    | 19,1  |
| Sample 9   | Massenbach             | 35,7  | 35,4  | 38,1  | 36,4    | 33,1  | 33,0  | 32,0   | 32,7    | 19,7  |
| Sample 10  | Massenbach             | 29,9  | 29,2  | 29,4  | 29,5    | 28,8  | 28,7  | 28,2   | 28,6    | 19,4  |
| Sample 11  | Massenbach             | 34,7  | 34,2  | 36,3  | 35,1    | 32,0  | 32,1  | 31,6   | 31,9    | 19,2  |
| Sample 12  | Massenbach             | 30,2  | 30,3  | 28,4  | 29,6    | 30,2  | 27,5  | 29,3   | 29,0    | 18,6  |
| Sample 13  | Massenbach             | 33,3  | 32,2  | 33,5  | 33,0    | 31,4  | 31,5  | 30,9   | 31,2    | 19,4  |
| Sample 14  | Massenbach             | 30,1  | 30,3  | 30,3  | 30,2    | 28,9  | 28,6  | 28,5   | 28,7    | 18,4  |
| Sample 15  | Gemmingen              | 27,2  | 27,4  | 27,5  | 27,3    | 27,0  | 26,9  | 25,7   | 26,5    | 17,4  |
| Sample 16  | Gemmingen              | 29,7  | 29,9  | 30,7  | 30,1    | 29,2  | 29,2  | 28,9   | 29,1    | 19,4  |
| Sample 17  | Gemmingen              | 33,1  | 33,3  | 34,2  | 33,5    | 31,8  | 31,8  | 31,1   | 31,5    | 17,9  |
| Sample 18  | Gemmingen              | 29,6  | 29,5  | 30,2  | 29,8    | 29,3  | 29,3  | 29,0   | 29,2    | 19,3  |
| Sample 19  | Gemmingen              | 32,1  | 31,4  | 34,0  | 32,5    | 31,0  | 30,9  | 30,6   | 30,8    | 18,0  |
| Sample 20  | Fürfeld                | 26,5  | 26,5  | 26,6  | 26,6    | 27,1  | 27,0  | 26,7   | 26,9    | 19,7  |
| Sample 21  | Fürfeld                | 28,8  | 29,0  | 29,1  | 29,0    | 28,6  | 28,6  | 28,3   | 28,5    | 17,1  |
| Sample 22  | Fürfeld                | 27,6  | 27,4  | 27,6  | 27,5    | 26,5  | 26,9  | 23,8   | 25,7    | 16,2  |
| Sample 23  | Fürfeld                | 28,5  | 28,5  | 28,6  | 28,5    | 29,1  | 28,6  | 28,4   | 28,7    | 17,9  |
| Sample 24  | Fürfeld                | 28,4  | 28,1  | 28,3  | 28,2    | 28,0  | 28,1  | 27,7   | 27,9    | 17,5  |
| Sample 25  | Fürfeld                | 29,0  | 29,6  | 29,5  | 29,4    | 28,6  | 28,5  | 28,6   | 28,6    | 18,8  |
| Sample 26  | Bickenbach             | 30,3  | 31,1  | 32,4  | 31,2    | 30,3  | 30,3  | 30,1   | 30,2    | 18,3  |
| Sample 27  | Bickenbach             | 29,7  | 29,4  | 29,2  | 29,4    | 28,7  | 28,9  | 28,4   | 28,7    | 18,0  |
| Sample 28  | Bickenbach             | 31,4  | 31,2  | 31,9  | 31,5    | 30,3  | 30,3  | 30,1   | 30,2    | 20,4  |
| Sample 29  | Bickenbach             | 29,0  | 28,8  | 28,7  | 28,8    | 29,7  | 29,7  | 29,1   | 29,5    | 20,3  |
| Sample 30  | Bickenbach             | 29,4  | 29,9  | 29,3  | 29,5    | 30,3  | 30,4  | 30,1   | 30,3    | 20,3  |
| Sample 31  | Ochsenfurt, Gollhofen  | 26,7  | 27,1  | 26,8  | 26,9    | 27,2  | 27,1  | 26,6   | 27,0    | 18,7  |
| Sample 32  | Ochsenfurt, Gollhofen  | 28,8  | 29,0  | 29,1  | 29,0    | 29,1  | 28,8  | 28,7   | 28,9    | 19,3  |
| Sample 33  | Ochsenfurt, Gollhofen  | 29,4  | 28,7  | 29,2  | 29,1    | 28,8  | 28,7  | 28,5   | 28,7    | 18,4  |
| Sample 34  | Ochsenfurt, Gollhofen  | 27,6  | 27,3  | 27,3  | 27,4    | 27,6  | 27,7  | 27,2   | 27,5    | 19,4  |
| Sample 35  | Ochsenfurt, Gollhofen  | 27,4  | 27,3  | 26,8  | 27,2    | 27,7  | 27,6  | 27,4   | 27,6    | 19,1  |
| Sample 36  | Ochsenfurt, Gollhofen  | 28,4  | 28,6  | 28,3  | 28,4    | 28,6  | 28,5  | 28,1   | 28,4    | 18,5  |
| Sample 37  | Deutschthof (Südpfalz) | 28,9  | 29,9  | 30,1  | 29,6    | 29,4  | 29,0  | 29,1   | 29,2    | 19,0  |
| Sample 38  | Deutschthof (Südpfalz) | 28,2  | 29,4  | 28,9  | 28,8    | 28,0  | 28,3  | 28,1   | 28,1    | 19,1  |
| Sample 39  | Deutschthof (Südpfalz) | 25,4  | 25,2  | 25,2  | 25,3    | 25,8  | 25,8  | 25,5   | 25,7    | 19,2  |
| Sample 40  | Deutschthof (Südpfalz) | 28,5  | 27,8  | 28,4  | 28,2    | 28,5  | 28,2  | 28,2   | 28,3    | 18,8  |
| Sample 41  | Deutschthof (Südpfalz) | 23,8  | 26,5  | 26,6  | 25,6    | 26,8  | 27,0  | 26,7   | 26,8    | 18,4  |
| Sample 42  | Deutschthof (Südpfalz) | 28,0  | 28,3  | 28,4  | 28,2    | 28,5  | 28,2  | 28,1   | 28,3    | 19,6  |
| Sample 43  | Heddesheim             | 25,5  | 25,8  | 25,7  | 25,7    | 25,6  | 25,7  | 24,8   | 25,4    | 20,6  |
| Sample 44  | Heddesheim             | 28,1  | 27,9  | 28,7  | 28,2    | 28,8  | 28,6  | 28,4   | 28,6    | 19,7  |
| Sample 45  | Heddesheim             | 27,0  | 27,2  | 27,4  | 27,2    | 27,5  | 27,6  | 27,0   | 27,4    | 20,5  |
| Sample 46  | Heddesheim             | 27,8  | 28,1  | 27,8  | 27,9    | 27,6  | 27,5  | 27,2   | 27,4    | 19,7  |
| Sample 47  | Heddesheim             | 27,8  | 27,5  | 27,2  | 27,5    | 28,3  | 28,3  | 27,7   | 28,1    | 19,7  |
| Sample 48  | Heddesheim             | 28,4  | 27,8  | 27,0  | 27,7    | 28,2  | 27,7  | 27,7   | 27,9    | 20,4  |
| Sample 49  | Ochsenfurt, Rodheim    | 29,6  | 30,1  | 29,9  | 29,9    | 30,1  | 30,0  | 30,0   | 30,0    | 18,8  |
| Sample 50  | Ochsenfurt, Rodheim    | 32,4  | 32,7  | 33,1  | 32,7    | 32,5  | 32,3  | 32,6   | 32,4    | 19,4  |
| Sample 51  | Ochsenfurt, Rodheim    | 29,9  | 29,9  | 29,8  | 29,9    | 30,2  | 30,5  | 30,1   | 30,3    | 19,6  |
| Sample 52  | Ochsenfurt, Rodheim    | 27,8  | 27,9  | 27,8  | 27,8    | 28,5  | 28,1  | 28,0   | 28,2    | 20,1  |
| Sample 53  | Ochsenfurt, Rodheim    | 28,8  | 28,7  | 28,3  | 28,6    | 29,1  | 29,2  | 29,3   | 29,2    | 19,4  |
| Sample 54  | Ochsenfurt, Rodheim    | 31,0  | 31,1  | 30,9  | 31,0    | 30,9  | 30,9  | 30,9   | 30,9    | 20,5  |
| Sample 55  | Welsau                 | 28,5  | 28,2  | 27,8  | 28,2    | 28,0  | 27,6  | 27,6   | 27,7    | 21,2  |
| Sample 56  | Welsau                 | 30,0  | 30,0  | 29,4  | 29,8    | 29,6  | 29,3  | 28,8   | 29,2    | 21,3  |
| Sample 57  | Welsau                 | 29,2  | 28,9  | 28,6  | 28,9    | 28,9  | 28,6  | 28,5   | 28,7    | 21,1  |
| Sample 58  | Welsau                 | 32,3  | 32,4  | 31,6  | 32,1    | 31,7  | 31,6  | 31,4   | 31,6    | 19,4  |
| Sample 59  | Fürfeld                | 28,2  | 28,5  | 27,9  | 28,2    | 28,4  | 28,2  | 28,1   | 28,2    | 18,5  |
| Sample 60  | Wendershausen          | 40,0  | 40,0  | 40,0  | 40,0    | 40,0  | 40,0  | 40,0   | 40,0    | 20,1  |
| Sample 61  | Wendershausen          | 40,0  | 40,0  | 40,0  | 40,0    | 40,0  | 40,0  | 40,0   | 40,0    | 18,0  |
| Sample 62  | Bondorf                | 40,0  | 40,0  | 40,0  | 40,0    | 40,0  | 40,0  | 40,0   | 40,0    | 18,0  |
| Sample 63  | Bondorf                | 40,0  | 40,0  | 40,0  | 40,0    | 40,0  | 40,0  | 40,0   | 40,0    | 18,0  |
| Sample 64  | Bondorf                | 40,0  | 40,0  | 40,0  | 40,0    | 40,0  | 40,0  | 40,0   | 40,0    | 16,1  |
| Sample 65  | Wendershausen          | 40,0  | 40,0  | 40,0  | 40,0    | 40,0  | 40,0  | 40,0   | 40,0    | 18,7  |
| Sample 66  | Wendershausen          | 40,0  | 40,0  | 40,0  | 40,0    | 40,0  | 40,0  | 40,0   | 40,0    | 18,7  |
| Sample 67  | Wendershausen          | 40,0  | 40,0  | 40,0  | 40,0    | 40,0  | 40,0  | 40,0   | 40,0    | 18,3  |
| Sample 68  | Wendershausen          | 40,0  | 40,0  | 40,0  | 40,0    | 40,0  | 40,0  | 40,0   | 40,0    | 18,2  |
| Sample 69  | Wendershausen          | 40,0  | 40,0  | 40,0  | 40,0    | 40,0  | 40,0  | 40,0   | 40,0    | 18,0  |
| Sample 70  | Wendershausen          | 40,0  | 40,0  | 40,0  | 40,0    | 40,0  | 40,0  | 40,0   | 40,0    | 18,7  |
| Sample 71  | Wendershausen          | 40,0  | 40,0  | 40,0  | 40,0    | 40,0  | 40,0  | 40,0   | 40,0    | 18,9  |
| Sample 72  | Wendershausen          | 40,0  | 40,0  | 40,0  | 40,0    | 40,0  | 40,0  | 40,0   | 40,0    | 18,5  |
| Sample 73  | Wendershausen          | 40,0  | 40,0  | 40,0  | 40,0    | 40,0  | 40,0  | 40,0   | 40,0    | 17,4  |
| Sample 74  | Wendershausen          | 40,0  | 40,0  | 40,0  | 40,0    | 40,0  | 40,0  | 40,0   | 40,0    | 16,2  |
| Sample 75  | Wendershausen          | 40,0  | 40,0  | 40,0  | 40,0    | 40,0  | 40,0  | 40,0   | 40,0    | 20,7  |
| Sample 76  | Wendershausen          | 40,0  | 40,0  | 40,0  | 40,0    | 40,0  | 40,0  | 40,0   | 40,0    | 18,5  |
| Sample 77  | Wendershausen          | 40,0  | 40,0  | 40,0  | 40,0    | 40,0  | 40,0  | 40,0   | 40,0    | 17,5  |
| Sample 78  | Wendershausen          | 40,0  | 40,0  | 40,0  | 40,0    | 40,0  | 40,0  | 40,0   | 40,0    | 18,2  |
| NTC 1      |                        | 40,0  | 40,0  | 40,0  | 40,0    | 40,0  | 40,0  | 40,0   | 40,0    | 40,0  |
| NTC 2      |                        | 40,0  | 40,0  | 40,0  | 40,0    | 40,0  | 40,0  | 40,0   | 40,0    | 37,9  |
| NTC 3      |                        | 40,0  | 40,0  | 40,0  | 40,0    | 40,0  | 40,0  | 40,0   | 40,0    | 40,0  |
| NTC 4      |                        | 40,0  | 40,0  | 40,0  | 40,0    | 40,0  | 40,0  | 40,0   | 40,0    | 40,0  |
